# Supplementary material for: Transcriptome Analysis of Salvia miltiorrhiza under Drought Stress
Source: Plants (Basel). 2024 Jan 6;13(2):161. doi: 10.3390/plants13020161 (PMC10819027; doi:10.3390/plants13020161)
Supplement: Supplementary file 1 [file plants-13-00161-s001.zip › Supplementary Tables.xlsx]

## Sheet: Table S1
Table S1. 50 unigenes were annotated as laccase.
Gene-id	NR-description	Swiss-prot
TRINITY_DN10257_c0_g1	laccase-13 [Selaginella moellendorffii]	sp|O80434|LAC4_ARATH(Laccase-4 OS=Arabidopsis thaliana OX=3702 GN=IRX12 PE=2 SV=2)
TRINITY_DN10883_c0_g1	laccase-4 [Selaginella moellendorffii]	sp|Q2QZ80|LAC21_ORYSJ(Laccase-21 OS=Oryza sativa subsp. japonica OX=39947 GN=LAC21 PE=2 SV=1)
TRINITY_DN10883_c0_g2	laccase-12 [Selaginella moellendorffii]	sp|Q9SR40|LAC7_ARATH(Laccase-7 OS=Arabidopsis thaliana OX=3702 GN=LAC7 PE=2 SV=1)
TRINITY_DN12541_c0_g1	laccase-13 [Selaginella moellendorffii]	sp|Q6Z8L2|LAC9_ORYSJ(Putative laccase-9 OS=Oryza sativa subsp. japonica OX=39947 GN=LAC9 PE=3 SV=1)
TRINITY_DN12651_c0_g1	hypothetical protein SELMODRAFT_133734 [Selaginella moellendorffii]	sp|Q9FLB5|LAC12_ARATH(Laccase-12 OS=Arabidopsis thaliana OX=3702 GN=LAC12 PE=2 SV=1)
TRINITY_DN1429_c0_g1	laccase-12-like [Physcomitrella patens]	sp|Q941X2|LAC3_ORYSJ(Laccase-3 OS=Oryza sativa subsp. japonica OX=39947 GN=LAC3 PE=2 SV=1)
TRINITY_DN1476_c0_g1	hypothetical protein SELMODRAFT_133734 [Selaginella moellendorffii]	sp|Q9FLB5|LAC12_ARATH(Laccase-12 OS=Arabidopsis thaliana OX=3702 GN=LAC12 PE=2 SV=1)
TRINITY_DN16612_c0_g1	hypothetical protein SELMODRAFT_133734 [Selaginella moellendorffii]	sp|Q8VZA1|LAC11_ARATH(Laccase-11 OS=Arabidopsis thaliana OX=3702 GN=LAC11 PE=2 SV=1)
TRINITY_DN16612_c0_g2	hypothetical protein SELMODRAFT_133734 [Selaginella moellendorffii]	sp|Q8VZA1|LAC11_ARATH(Laccase-11 OS=Arabidopsis thaliana OX=3702 GN=LAC11 PE=2 SV=1)
TRINITY_DN18156_c0_g1	laccase-4 [Selaginella moellendorffii]	sp|Q9LMS3|LAC1_ARATH(Laccase-1 OS=Arabidopsis thaliana OX=3702 GN=LAC1 PE=2 SV=1)
TRINITY_DN18247_c0_g1		sp|O80434|LAC4_ARATH(Laccase-4 OS=Arabidopsis thaliana OX=3702 GN=IRX12 PE=2 SV=2)
TRINITY_DN1855_c0_g1	laccase-4 [Selaginella moellendorffii]	sp|Q9FY79|LAC14_ARATH(Laccase-14 OS=Arabidopsis thaliana OX=3702 GN=LAC14 PE=2 SV=1)
TRINITY_DN20525_c0_g1	laccase-12 [Selaginella moellendorffii]	sp|Q9SR40|LAC7_ARATH(Laccase-7 OS=Arabidopsis thaliana OX=3702 GN=LAC7 PE=2 SV=1)
TRINITY_DN21005_c0_g1	laccase-10 [Selaginella moellendorffii]	sp|O80434|LAC4_ARATH(Laccase-4 OS=Arabidopsis thaliana OX=3702 GN=IRX12 PE=2 SV=2)
TRINITY_DN21005_c0_g2	hypothetical protein SELMODRAFT_80214 [Selaginella moellendorffii]	sp|O80434|LAC4_ARATH(Laccase-4 OS=Arabidopsis thaliana OX=3702 GN=IRX12 PE=2 SV=2)
TRINITY_DN21005_c0_g3	laccase-12 [Selaginella moellendorffii]	sp|Q0IQU1|LAC22_ORYSJ(Laccase-22 OS=Oryza sativa subsp. japonica OX=39947 GN=LAC22 PE=2 SV=2)
TRINITY_DN21005_c0_g4	laccase-4 isoform X1 [Selaginella moellendorffii]	sp|O80434|LAC4_ARATH(Laccase-4 OS=Arabidopsis thaliana OX=3702 GN=IRX12 PE=2 SV=2)
TRINITY_DN21134_c0_g1	laccase-4-like isoform X3 [Physcomitrella patens]	sp|Q9FLB5|LAC12_ARATH(Laccase-12 OS=Arabidopsis thaliana OX=3702 GN=LAC12 PE=2 SV=1)
TRINITY_DN212_c0_g1	hypothetical protein SELMODRAFT_133734 [Selaginella moellendorffii]	sp|Q9FJD5|LAC17_ARATH(Laccase-17 OS=Arabidopsis thaliana OX=3702 GN=LAC17 PE=2 SV=1)
TRINITY_DN21732_c0_g1	laccase-13 [Selaginella moellendorffii]	sp|Q9LYQ2|LAC13_ARATH(Laccase-13 OS=Arabidopsis thaliana OX=3702 GN=LAC13 PE=2 SV=1)
TRINITY_DN22065_c0_g1	laccase-12 [Selaginella moellendorffii]	sp|Q9FJD5|LAC17_ARATH(Laccase-17 OS=Arabidopsis thaliana OX=3702 GN=LAC17 PE=2 SV=1)
TRINITY_DN22065_c0_g2	hypothetical protein SELMODRAFT_133734 [Selaginella moellendorffii]	sp|Q9FJD5|LAC17_ARATH(Laccase-17 OS=Arabidopsis thaliana OX=3702 GN=LAC17 PE=2 SV=1)
TRINITY_DN22065_c0_g3	hypothetical protein SELMODRAFT_133734 [Selaginella moellendorffii]	sp|Q9FJD5|LAC17_ARATH(Laccase-17 OS=Arabidopsis thaliana OX=3702 GN=LAC17 PE=2 SV=1)
TRINITY_DN22797_c0_g1	laccase-4 [Selaginella moellendorffii]	sp|O80434|LAC4_ARATH(Laccase-4 OS=Arabidopsis thaliana OX=3702 GN=IRX12 PE=2 SV=2)
TRINITY_DN23230_c0_g1	hypothetical protein SELMODRAFT_114788 [Selaginella moellendorffii]	sp|Q9FY79|LAC14_ARATH(Laccase-14 OS=Arabidopsis thaliana OX=3702 GN=LAC14 PE=2 SV=1)
TRINITY_DN24132_c0_g1	laccase-13 [Selaginella moellendorffii]	sp|Q8VZA1|LAC11_ARATH(Laccase-11 OS=Arabidopsis thaliana OX=3702 GN=LAC11 PE=2 SV=1)
TRINITY_DN24788_c0_g1	laccase-11-like [Physcomitrella patens]	sp|Q8VZA1|LAC11_ARATH(Laccase-11 OS=Arabidopsis thaliana OX=3702 GN=LAC11 PE=2 SV=1)
TRINITY_DN25923_c0_g2	hypothetical protein SELMODRAFT_133734 [Selaginella moellendorffii]	sp|Q84J37|LAC15_ARATH(Laccase-15 OS=Arabidopsis thaliana OX=3702 GN=TT10 PE=1 SV=1)
TRINITY_DN2612_c0_g1	hypothetical protein SELMODRAFT_133734 [Selaginella moellendorffii]	sp|Q9FY79|LAC14_ARATH(Laccase-14 OS=Arabidopsis thaliana OX=3702 GN=LAC14 PE=2 SV=1)
TRINITY_DN26569_c0_g1	laccase-4 [Selaginella moellendorffii]	sp|O80434|LAC4_ARATH(Laccase-4 OS=Arabidopsis thaliana OX=3702 GN=IRX12 PE=2 SV=2)
TRINITY_DN27213_c0_g1	hypothetical protein SELMODRAFT_133734 [Selaginella moellendorffii]	sp|Q9LMS3|LAC1_ARATH(Laccase-1 OS=Arabidopsis thaliana OX=3702 GN=LAC1 PE=2 SV=1)
TRINITY_DN27669_c0_g1	hypothetical protein SELMODRAFT_133734 [Selaginella moellendorffii]	sp|O80434|LAC4_ARATH(Laccase-4 OS=Arabidopsis thaliana OX=3702 GN=IRX12 PE=2 SV=2)
TRINITY_DN2897_c0_g1	laccase-12 [Selaginella moellendorffii]	sp|Q9FY79|LAC14_ARATH(Laccase-14 OS=Arabidopsis thaliana OX=3702 GN=LAC14 PE=2 SV=1)
TRINITY_DN3024_c0_g1	laccase-4 [Selaginella moellendorffii]	sp|Q84J37|LAC15_ARATH(Laccase-15 OS=Arabidopsis thaliana OX=3702 GN=TT10 PE=1 SV=1)
TRINITY_DN31966_c0_g1	laccase-4 [Selaginella moellendorffii]	sp|Q9LMS3|LAC1_ARATH(Laccase-1 OS=Arabidopsis thaliana OX=3702 GN=LAC1 PE=2 SV=1)
TRINITY_DN33255_c0_g1	laccase-4 [Selaginella moellendorffii]	sp|Q9LFD2|LAC8_ARATH(Laccase-8 OS=Arabidopsis thaliana OX=3702 GN=LAC8 PE=2 SV=1)
TRINITY_DN33682_c0_g1	laccase-4 [Selaginella moellendorffii]	sp|Q9SR40|LAC7_ARATH(Laccase-7 OS=Arabidopsis thaliana OX=3702 GN=LAC7 PE=2 SV=1)
TRINITY_DN35267_c0_g1	hypothetical protein SELMODRAFT_133734 [Selaginella moellendorffii]	sp|Q56YT0|LAC3_ARATH(Laccase-3 OS=Arabidopsis thaliana OX=3702 GN=LAC3 PE=2 SV=2)
TRINITY_DN3667_c0_g1	hypothetical protein SELMODRAFT_80214 [Selaginella moellendorffii]	sp|Q9SR40|LAC7_ARATH(Laccase-7 OS=Arabidopsis thaliana OX=3702 GN=LAC7 PE=2 SV=1)
TRINITY_DN3667_c0_g3	laccase-12 [Selaginella moellendorffii]	sp|Q9SR40|LAC7_ARATH(Laccase-7 OS=Arabidopsis thaliana OX=3702 GN=LAC7 PE=2 SV=1)
TRINITY_DN3667_c1_g1	laccase-4 [Selaginella moellendorffii]	sp|Q9SR40|LAC7_ARATH(Laccase-7 OS=Arabidopsis thaliana OX=3702 GN=LAC7 PE=2 SV=1)
TRINITY_DN511_c0_g1	laccase-13 [Selaginella moellendorffii]	sp|Q9ZPY2|LAC6_ARATH(Laccase-6 OS=Arabidopsis thaliana OX=3702 GN=LAC6 PE=2 SV=1)
TRINITY_DN5442_c0_g1	laccase-12 [Selaginella moellendorffii]	sp|Q6Z8L2|LAC9_ORYSJ(Putative laccase-9 OS=Oryza sativa subsp. japonica OX=39947 GN=LAC9 PE=3 SV=1)
TRINITY_DN5442_c0_g2	laccase-10 [Selaginella moellendorffii]	sp|Q9FY79|LAC14_ARATH(Laccase-14 OS=Arabidopsis thaliana OX=3702 GN=LAC14 PE=2 SV=1)
TRINITY_DN5442_c1_g1	hypothetical protein SELMODRAFT_80214 [Selaginella moellendorffii]	sp|Q9FY79|LAC14_ARATH(Laccase-14 OS=Arabidopsis thaliana OX=3702 GN=LAC14 PE=2 SV=1)
TRINITY_DN7679_c0_g1	hypothetical protein SELMODRAFT_78002 [Selaginella moellendorffii]	sp|Q9FY79|LAC14_ARATH(Laccase-14 OS=Arabidopsis thaliana OX=3702 GN=LAC14 PE=2 SV=1)
TRINITY_DN7679_c0_g2	hypothetical protein AXG93_4193s1420 [Marchantia polymorpha subsp. ruderalis]	sp|Q84J37|LAC15_ARATH(Laccase-15 OS=Arabidopsis thaliana OX=3702 GN=TT10 PE=1 SV=1)
TRINITY_DN8533_c0_g1	laccase-12 [Selaginella moellendorffii]	sp|Q9SR40|LAC7_ARATH(Laccase-7 OS=Arabidopsis thaliana OX=3702 GN=LAC7 PE=2 SV=1)
TRINITY_DN8837_c0_g1	laccase-12 [Selaginella moellendorffii]	sp|Q2QZ80|LAC21_ORYSJ(Laccase-21 OS=Oryza sativa subsp. japonica OX=39947 GN=LAC21 PE=2 SV=1)
TRINITY_DN9916_c0_g1	laccase-11 isoform X1 [Selaginella moellendorffii]	sp|Q2QZ80|LAC21_ORYSJ(Laccase-21 OS=Oryza sativa subsp. japonica OX=39947 GN=LAC21 PE=2 SV=1)

## Sheet: Table S2
Table S2. 11 unigenes were annotated as PYL/PYR/RCAR and 9 of them were annotated in both drought and ABA transcriptome databases.
drought	ABA
TRINITY_DN11812_c0_g2	TRINITY_DN22219_c0_g1
TRINITY_DN13627_c0_g1	TRINITY_DN25259_c0_g1
TRINITY_DN2396_c0_g1	TRINITY_DN16715_c0_g1
TRINITY_DN2605_c1_g1	TRINITY_DN41714_c0_g1
TRINITY_DN2605_c1_g2	TRINITY_DN21346_c0_g1
TRINITY_DN2605_c2_g1	TRINITY_DN21346_c0_g2
TRINITY_DN33124_c0_g1	TRINITY_DN37043_c0_g1
TRINITY_DN5107_c0_g2	TRINITY_DN15685_c0_g1
TRINITY_DN2605_c0_g2	TRINITY_DN22219_c1_g1
TRINITY_DN2605_c0_g1
TRINITY_DN5138_c0_g3
